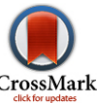

## Correction

# Correction: Podocyte Developmental Defects Caused by Adriamycin in Zebrafish Embryos and Larvae: A Novel Model of Glomerular Damage

The *PLOS ONE* Staff

There is an error in affiliation 3 as it should be divided into two separate institutions. Massimo Mariotti is affiliated with:

3 Department of Biomedical, Surgical and Dental Sciences,  
University of Milan, Milan, Italy

8 IRCCS Galeazzi Orthopedic Institute, Milan, Italy

## Reference

1. Zennaro C, Mariotti M, Carraro M, Pasqualetti S, Corbelli A, et al. (2014) Podocyte Developmental Defects Caused by Adriamycin in Zebrafish Embryos and Larvae: A Novel Model of Glomerular Damage. *PLoS ONE* 9(5): e98131. doi:10.1371/journal.pone.0098131

**Citation:** The *PLOS ONE* Staff (2014) Correction: Podocyte Developmental Defects Caused by Adriamycin in Zebrafish Embryos and Larvae: A Novel Model of Glomerular Damage. *PLoS ONE* 9(8): e105848. doi:10.1371/journal.pone.0105848

**Published:** August 12, 2014

**Copyright:** © 2014 The *PLOS ONE* Staff. This is an open-access article distributed under the terms of the Creative Commons Attribution License, which permits unrestricted use, distribution, and reproduction in any medium, provided the original author and source are credited.
